# Supplementary material
Source: PubMed Central journal article supplement (PMC3089676)
Supplement: NIHMS259181-supplement-1_si_001.pdf [file NIHMS259181-supplement-1_si_001.pdf]

Supplementary data

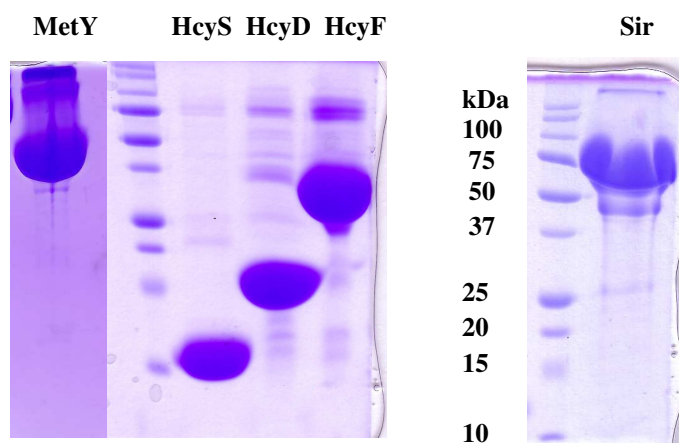

**Figure 1s.** SDS-PAGE of some of the Ni-NTA purified His-tagged proteins, HcyS, HcyD, HcyF, Sir and MetY.

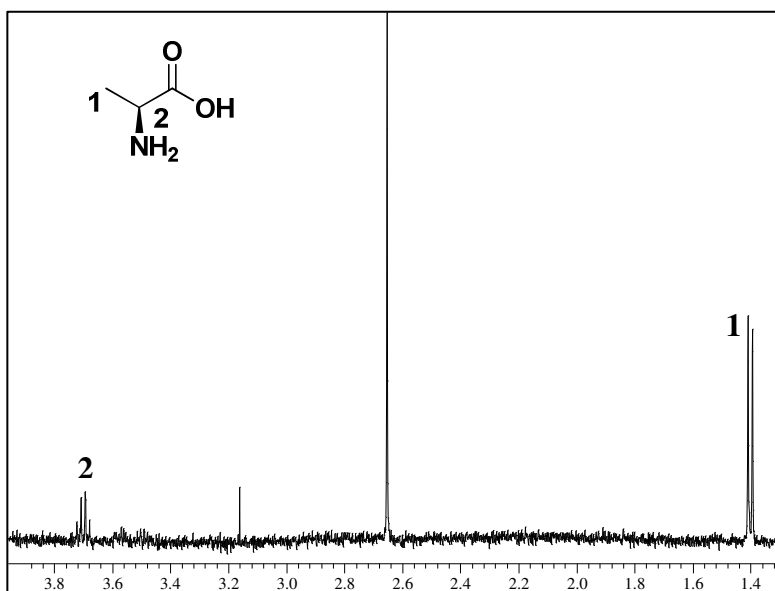

**Figure 2s.** <sup>1</sup>H-NMR of L-alanine released from HcyS-Ala upon treatment with HcyD.

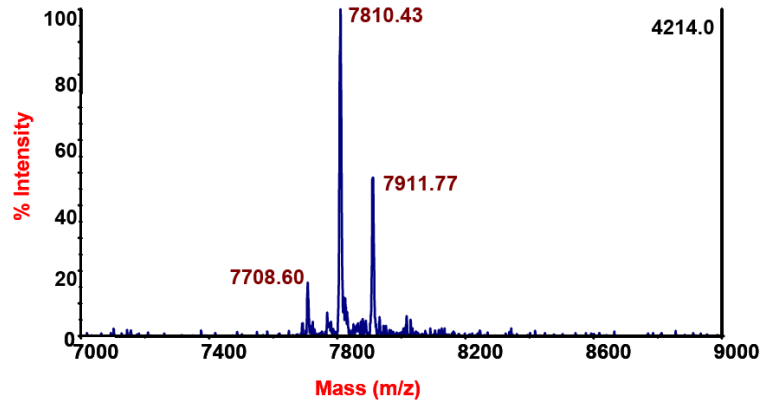

**Figure 3s.** HcyS-COSH (observed mass: 7708.6 Da, expected mass: 7704.82 Da, error: 0.05%) in the presence of MetY and O-acetyl-L-homoserine, 1 h incubation time, is converted to HcyS-homocysteine (observed mass: 7810.43 Da, expected mass: 7805.96 Da, error: 0.06%) and a higher molecular-weight adduct (7911.77 Da) whose identity is not known but could possibly be the HcyS-homolanthionine adduct.

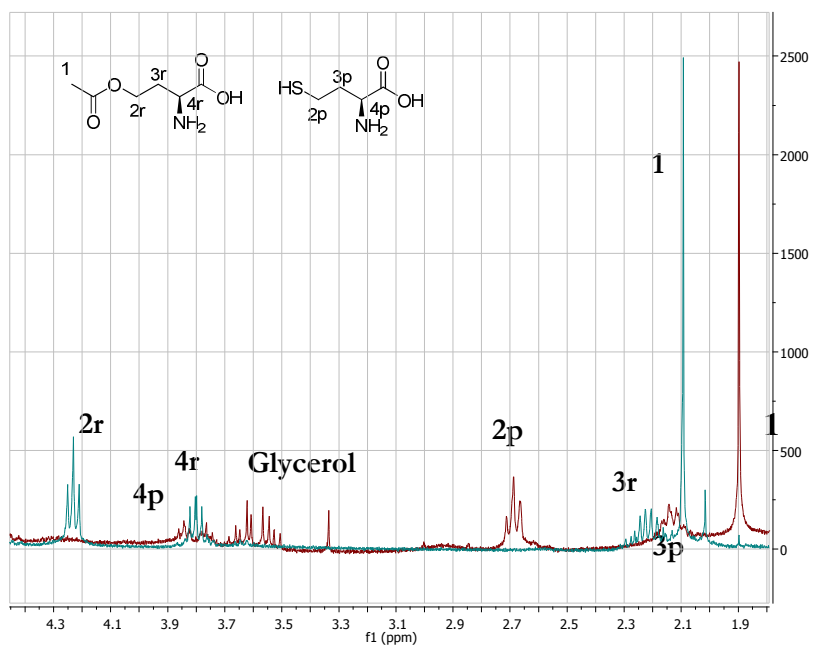

**Figure 4s.** <sup>1</sup>H-NMR of L-homocysteine formed by the MetY-catalyzed addition of sulfide to O-acetyl-L-homoserine (red), 1 h incubation time. No homocysteine is formed in the absence of the enzyme (blue).

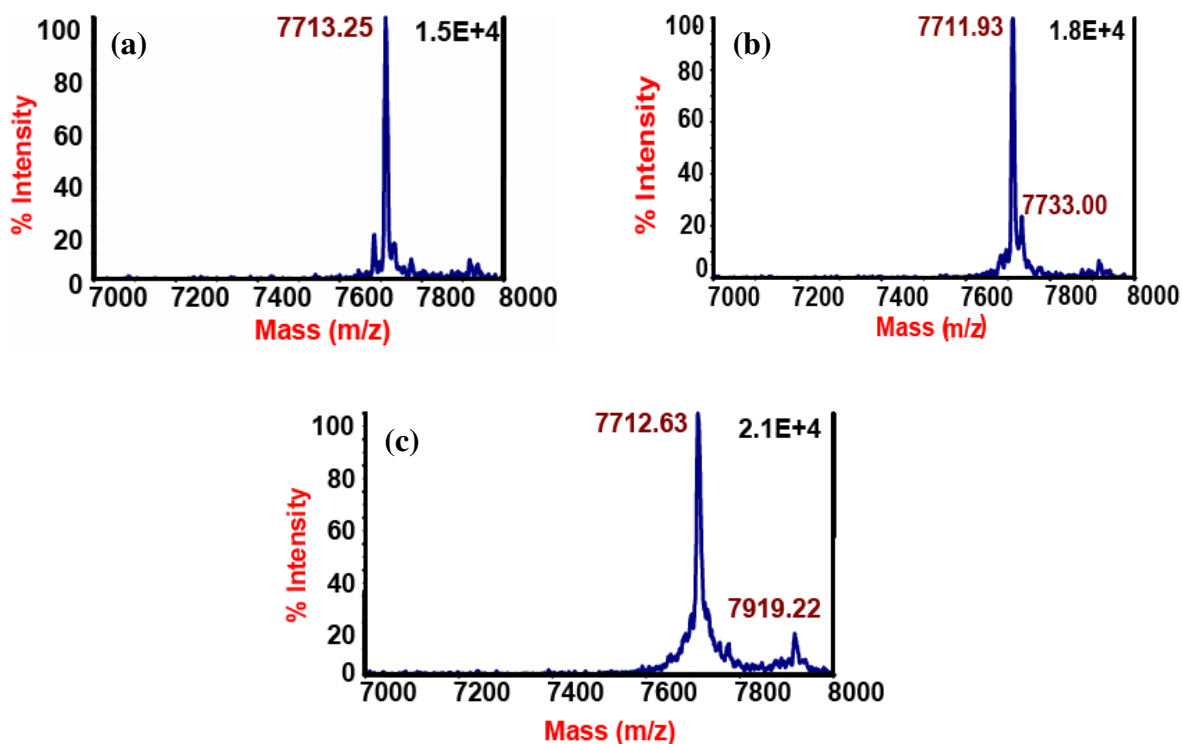

**Figure 5s.** MALDI-MS analysis of (a) HcyS-COSH (observed mass: 7713.25 Da, expected mass: 7704.82 Da, error: 0.1%) in the presence of MetZ and O-acetyl-L-serine, (b) HcyS-COSH (observed mass: 7711.93 Da, expected mass: 7704.82 Da, error: 0.09%) in the presence of MetZ and O-acetyl-L-homoserine (c) HcyS-COSH (observed mass: 7712.63 Da, expected mass: 7704.82 Da, error: 0.1%) in the presence of MetZ and O-succinyl-L-homoserine. No 7805.96 Da adduct corresponding to HcyS-Homocysteine adduct is formed in any of these cases.

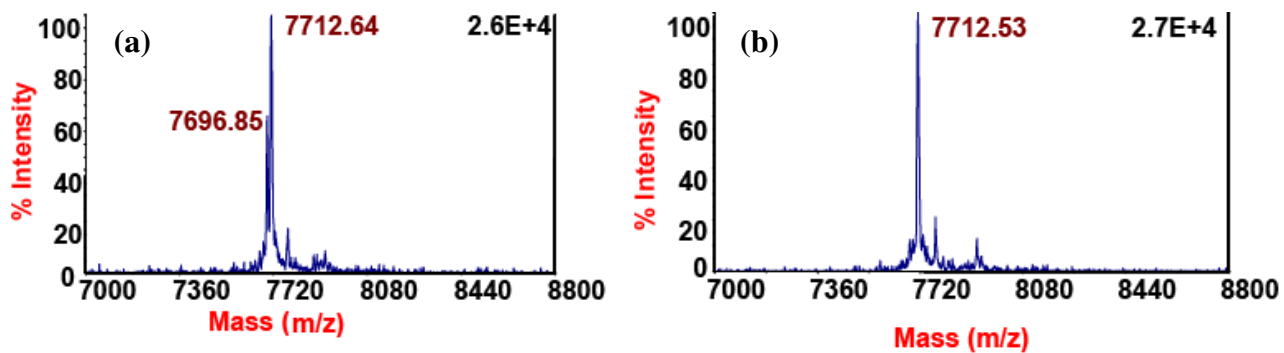

**Figure 6s.** MALDI-MS analysis (a) HcyS-COSH (observed mass: 7712.64 Da, expected mass: 7704.82 Da, error: 0.1%) in the presence of HcyD forms HcyS-COOH (observed mass: 7696.85 Da, expected mass: 7688.82 Da, error: 0.1%, observed mass change: 15.79 Da) (b) HcyS-COSH (observed mass: 7712.53 Da, expected mass: 7704.82 Da, error: 0.1%) in the absence of HcyD.

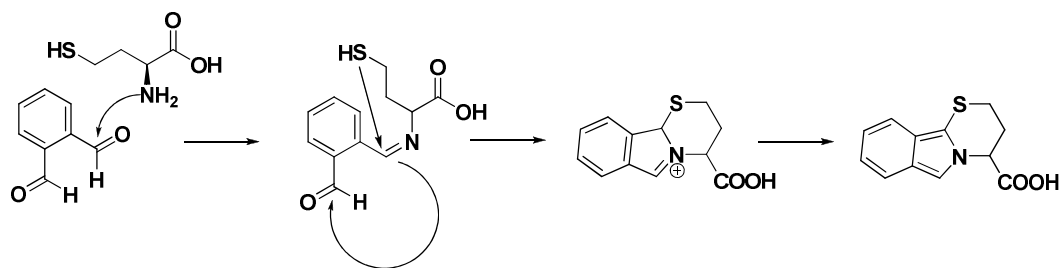

**Figure 7s.** o-Phthalaldehyde derivatization of homocysteine .

```

      1      10      20      30      40      50      60
W.succinogenes MNL I I N G E N K S F E . K E G L S V K E L L V L E S V K M P E M V S I Q L N D E F L R E P E Y A T T S L K E G D T I N F I Y F M G G G A
C.kluyveri      M N I K I N G D P K E I K . . D G L T V T E L L K I E N V E M P D M V S V Q L N D E F I D R A N F S T T V L K E N D K I D F L Y F M G G G T
C.phaeobacteroides M R L T I N G E K K E V A . P E S M T V T E L L K H Q G V E I P D M V S V Q V N G G F V E R D A F D S S I L K E G D E V D F L Y F M G G G C
G.uraniireducens  M N L T V N G K K A A I D G K D T V N I P A L L A E L K V E Q P D Y V T V E L N G D I L E R E N F E A T H V K D G D S V E F L Y F M G G G E
C.hydrogenoformans M K I V V N G A E K E I P . . Q S L T I A E L L E Y F Q V E M P N Y V S V L N G E F V K R E E F N N V K V S E G D E I E W M Y F M G G G G
C.saccharolyticus M K I K A N G N E V Q I E . . R E M T I F E M L D A L N V S M K E Y V T V Q L N G Q I I P R S E Y D K V T V K D G D E V E F L Y F M G G G L
consensus>50    M n i . i n G e e k e i e . . e . l t ! . e $ L . . e n V e m p # m V s ! q l N g e f i e r e e % d . t . v k # g D e ! # f $ Y F M G G G .

W.succinogenes  . . .
C.kluyveri      F G L .
C.phaeobacteroides F A . .
G.uraniireducens H . . .
C.hydrogenoformans Y A F A
C.saccharolyticus L . . .
consensus>50    f . . .

```

**Figure 8s.** Sequence alignment of putative HcyS-like proteins from *Wolinella succinogenes*, *Clostridium kluyveri* DSM 555, *Chlorobium phaeobacteroides* BS1, *Geobacter uraniireducens* Rf4, *Carboxydotherrnus hydrogenoformans* Z-2901 and *Caldicellulosiruptor saccharolyticus* DSM 8903. All these organisms have HcyS-like proteins clustered with HcyD-like metalloprotease and O-acetyl/O-succinylhomoserine sulfhydrylase.



**Table 1s.** Primers used for cloning genes in this study.

| Genes                                                   | Restriction sites | Vector    | Primers                                                                                                                                                                 |
|---------------------------------------------------------|-------------------|-----------|-------------------------------------------------------------------------------------------------------------------------------------------------------------------------|
| <i>sir</i>                                              | NdeI/XhoI         | THT       | Forward primer: 5'-GGG TAG CAT ATG AGC CAC TAC ACC CTA CCC CCC TCC GTC G-3'<br>Reverse primer: 5'-CCC TAC TCG AGT TAT CGT TTT TGA ATC CTC ACG CGC C-5'                  |
| <i>hcyD</i>                                             | NdeI/XhoI         | THT       | Forward primer: 5'-GGG TAG CAT ATG CTC AAA ATC CCT AAA GCG CTC TTT G-3'<br>Reverse primer: 5'-CCC TAC TCG AGT TAG ATC ACC TCG ATA TTT TCG GGA G-3'                      |
| <i>hcyF</i>                                             | NdeI/XhoI         | THT       | Forward primer: 5'-GGG TAG CAT ATG AGA GAG TTT AGC GAA GAG GAG CTA G-3'<br>Reverse primer: 5'-CCC TAC TCG AGT TAG GGA TTT TGA GCA TGA TTC ACC TCG CAG ATG GGT TGT TC-3' |
| <i>hcyS</i>                                             | NdeI/XhoI         | THT       | Forward primer: 5'-GGG TAG CAT ATG AAT CTC ATC ATC AAC GGA GAG AAT AAG-3'<br>Reverse primer: 5'-CCC TAC TCG AGT TAT GCG CCC CCT CCC ATG AAA TAT AAA AAG-3'              |
| <i>metY</i>                                             | NdeI/XhoI         | THT       | Forward primer: 5'-GGG TAG CAT ATG AGG GGA TTC ACC ACG AGG GCG C-3'<br>Reverse primer: 5'-CCC TAC TCG AGT TAA CAT AGC GCT TGC AAA ATA TCC TC-3'                         |
| <i>metZ</i>                                             | NdeI/XhoI         | THT       | Forward primer: 5'-CAGCACATGCATATGCC AGCCCACAAAGATGAGACT-3'<br>Reverse primer: 5'-TTATTCCGCTCGAGTTAA GCTTTGGCTAGGGCTTG-3'                                               |
| <i>250</i>                                              | NdeI/XhoI         | THT       | Forward primer: 5'-CAG ATT CAC ACC CAC ATG TGC TAT TCC GTC-3'<br>Reverse primer: 5'-GAC GGA ATA GCA CAT GTG GGT GTG AAT CTG-3'                                          |
| <i>Salmonella typhimurium cysG</i>                      | NcoI/XhoI         | pACYCDuet | Forward primer: 5'-GGG TAG CCA TGG ACC ATT TGC CTA TAT TTT GTC AAT TAC G-3'<br>Reverse primer: 5'-CCC TAC TCG AGT TAA TGA TTA GAG AAC CAA TTT AAT TTA TC-3'             |
| Truncated <i>hcyS</i> (with C-terminal alanine removed) | NdeI/SapI         | pTYB1     | Forward primer: 5'-CAGCACATGCATATGAAT CTCATCATCAACGGAGAGAATAA-3'<br>Reverse primer: 5'-AATGTTTGCTCTTCCGCA GCCTCCTCCCATGAAATATAAAA-3'                                    |
